# Supplementary material
Source: PubMed Central journal article supplement (PMC5690873)
Supplement: NIHMS905660-supplement-2.pdf [file NIHMS905660-supplement-2.pdf]

**Supplementary Table 1.** sgRNAs used for CRISPR/Cas9 depletion in human hepatocytes.

| <b>Target-sg#</b>                        | <b>Target sequence</b> |
|------------------------------------------|------------------------|
| Control (non-targeting “Scramble” sgRNA) | GCACTCACATCGCTACATCA   |
| <i>NLRX1</i> -sg#2 (T2)                  | GCGAAGTAGTCATCAG       |
| <i>NLRX1</i> -sg#3 (T3)                  | GATACGGCCAATGGCAG      |
| <i>MAVS</i> -sg#5                        | TATAAGTCCGAGGGCACCTT   |
| <i>IRF1</i> -sg#2                        | GAGCCAGATCCCAAGACG     |
| <i>IRF3</i> -sg#3                        | AGTATTCTCCAGGGAGG      |
| <i>RELA</i> -sg#1                        | CAATGATCTCCACATAG      |
| <i>RELA</i> -sg#3                        | TCCAGTGTGTGAAGAAG      |
| <i>PKR</i> -sg#1                         | GATGGAAGAGAATTTCCAGA   |
| <i>PKR</i> -sg#3                         | TGGTACAGGTTCTACTAAAC   |

**Supplementary Table 2.** Oligonucleotide primers

| Primer/Purpose                                                                                                                                                                                     | 5'-Sequence-3'                                                                                                                                            |
|----------------------------------------------------------------------------------------------------------------------------------------------------------------------------------------------------|-----------------------------------------------------------------------------------------------------------------------------------------------------------|
| pLOC-ClaXbaI/<br>Removal of TurboGFP-2A                                                                                                                                                            | F:ATCGATTCTAGAATGAAGACCTTCAACATCTCTCAGCAG<br>GATCTGGAG<br>R:ATCGATTCTAGAGGTATTATCGTGTTTTTCAAAGGAAAA<br>CCACGTCCC                                          |
| pLOC-NLRX1/<br>Cloning human NLRX1                                                                                                                                                                 | F:TTCTGCAGATATCACAAAGTTTGTACAAAAAAGTTGGCAT<br>GAGGTGGGGCCACCATT<br>R:TTAGCTAGCAACCACTTTGTACAAGAAAGTTGGGTATCA<br>GCTTCCAGAGCTTCC                           |
| X1T3-TarMut/<br>Mutating and sequencing NLRX1-T3<br>Underline labeling represents same sense<br>mutation (ATT→AT <u>C</u> , GGC→GG <u>T</u> ) to<br>prevent Cas9 editing of reconstituted<br>NLRX1 | F:GACCACTCGGCCCTCTGCCAT <u>CGG</u> TCGTATCCCCAGCAA<br>GTACGTGG<br>R:CCACGTACTTGCTGGGGATACG <u>ACC</u> GATGGCAGAGGGCC<br>GAGTGGTC<br>SEQ:CCTGATGGCTGCTGCTG |
| Bsd-NLRX1/<br>Switching selection marker in sgRNA<br>vector to blasticidin                                                                                                                         | F:GCTGGAGATGTTGAGAGCAACCCAGGTCCCATGAAAACC<br>TTCAACATCTCTCAG<br>R:GTAATCCAGAGGTTGATTGTCGACGTTTAAACTCAGTTC<br>CTGGTGTACTTGAG                               |
| hsIL6-3UTR/<br>Inserting IL6-3'UTR into psiCHECK2                                                                                                                                                  | F:CGTGGAGCGCGTGCTGAAGAACGAGCAGTAACATGGGC<br>ACCT<br>R:CGAATTC <sup>3</sup> CGGGCTCGAGCGATCGCTAGAAGGTATAAA<br>AACCATT<br>SEQ:GTACATCAAGAGCTTCGTGG          |
| <i>IFNB1</i> /<br>q-PCR of human <i>IFNB1</i> cDNA                                                                                                                                                 | F:CATTACCTGAAGGCCAAGGA<br>R:CAATTGTCCAGTCCCAGAGG                                                                                                          |
| <i>IFNL1</i> /<br>q-PCR of human <i>IFNL1</i> cDNA                                                                                                                                                 | F:CGCCTTGAAGAGTCACTCA<br>R:GAAGCCTCAGGTCCCAATTC                                                                                                           |
| <i>IL1B</i> /<br>q-PCR of human <i>IL1B</i> cDNA                                                                                                                                                   | F:GAAGCTGATGGCCCTAAACAG<br>R:AGCATCTTCTCAGCTTGTC                                                                                                          |
| <i>IL6</i> /<br>q-PCR of human <i>IL6</i> cDNA                                                                                                                                                     | F:CGGGAACGAAAGAGAAGCTCTA<br>R:GGCGCTTGTGGAGAAGGAG                                                                                                         |
| <i>IRF1</i> /<br>q-PCR of human <i>IRF1</i> cDNA                                                                                                                                                   | F:AGCTCAGCTGTGCGAGTGTA<br>R:CATGACTTCTCTTGGCCTT                                                                                                           |
| <i>IRF3</i> /<br>q-PCR of human <i>IRF3</i> cDNA                                                                                                                                                   | F:ACCAGCCGTGGACCAAGAG<br>R:TACCAAGGCCCTGAGGCAC                                                                                                            |
| <i>ACTB</i> /<br>q-PCR of human <i>ACTB</i> cDNA                                                                                                                                                   | F:GACCCAGATCATGTTTGAGACC<br>R:GTCACCGGAGTCCATCACGA                                                                                                        |
| HAV/<br>q-PCR of HAV genomic cDNA                                                                                                                                                                  | F:GGTAGGCTACGGGTGAAAC<br>R:AACAAC <sup>3</sup> TACCAATATCCGC                                                                                              |
| HCV/<br>Reverse transcription of HCV genomic<br>RNA and q-PCR of HCV cDNA                                                                                                                          | RT:GGCCAGTATCAGCACTCTCTGCAGTC<br>F:CATGGCGTTAGTATGAGTGTCGT<br>R:CCCTATCAGGCAGTACCACAA                                                                     |
| <i>Tnf</i> /<br>q-PCR of mouse <i>Tnf</i> cDNA                                                                                                                                                     | F:CATCTTCTCAA <sup>3</sup> AATTCGAGTGACAA<br>R:TGGGAGTAGACAAGGTACAACCC                                                                                    |
| <i>Ifnb</i> , <i>Il6</i> , <i>Actb</i> /<br>q-PCR of mouse <i>Ifnb</i> , <i>Il6</i> , <i>Actb</i> cDNAs                                                                                            | Primers were described previously <sup>8</sup> .                                                                                                          |
